# Supplementary material for: Vitamin D Promotes Ferroptosis in Colorectal Cancer Stem Cells via SLC7A11 Downregulation
Source: PubMed Central journal article supplement (PMC9950793; doi:10.1155/2023/4772134), 2023-02-16
Supplement: 4772134.f1.pdf [file 4772134.f1.pdf]

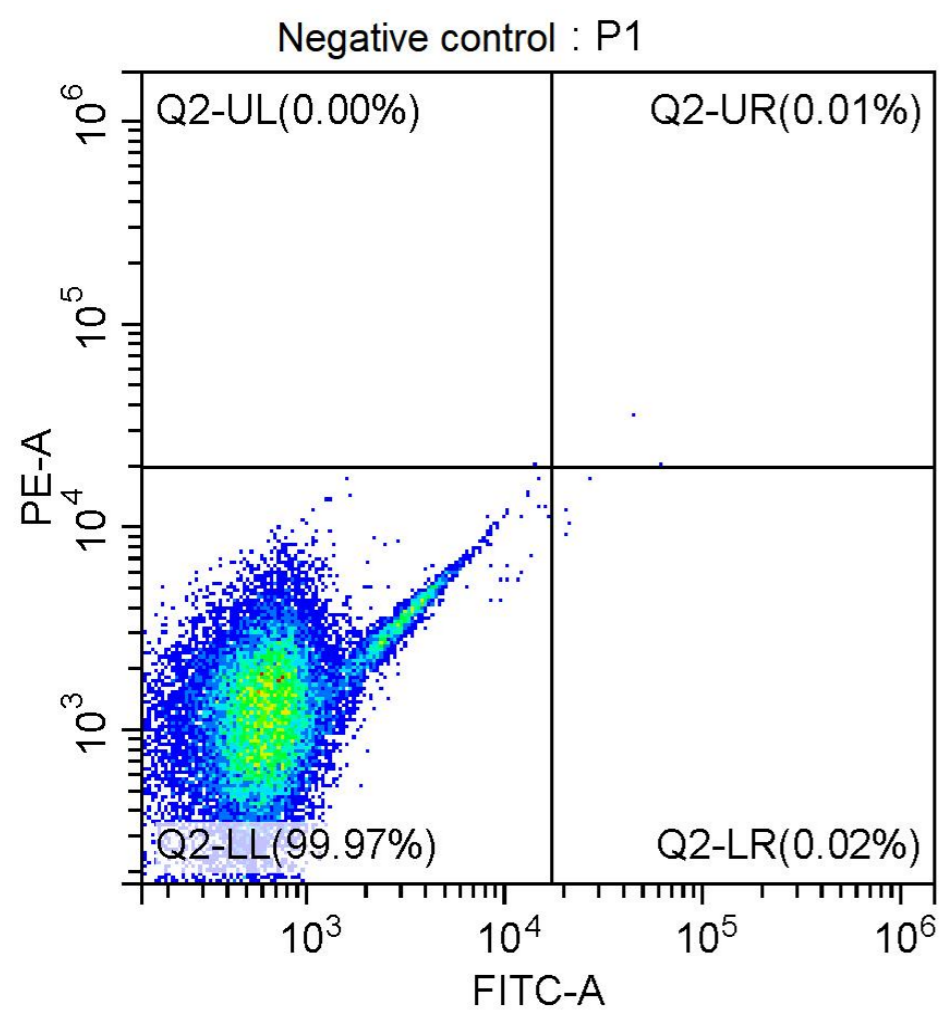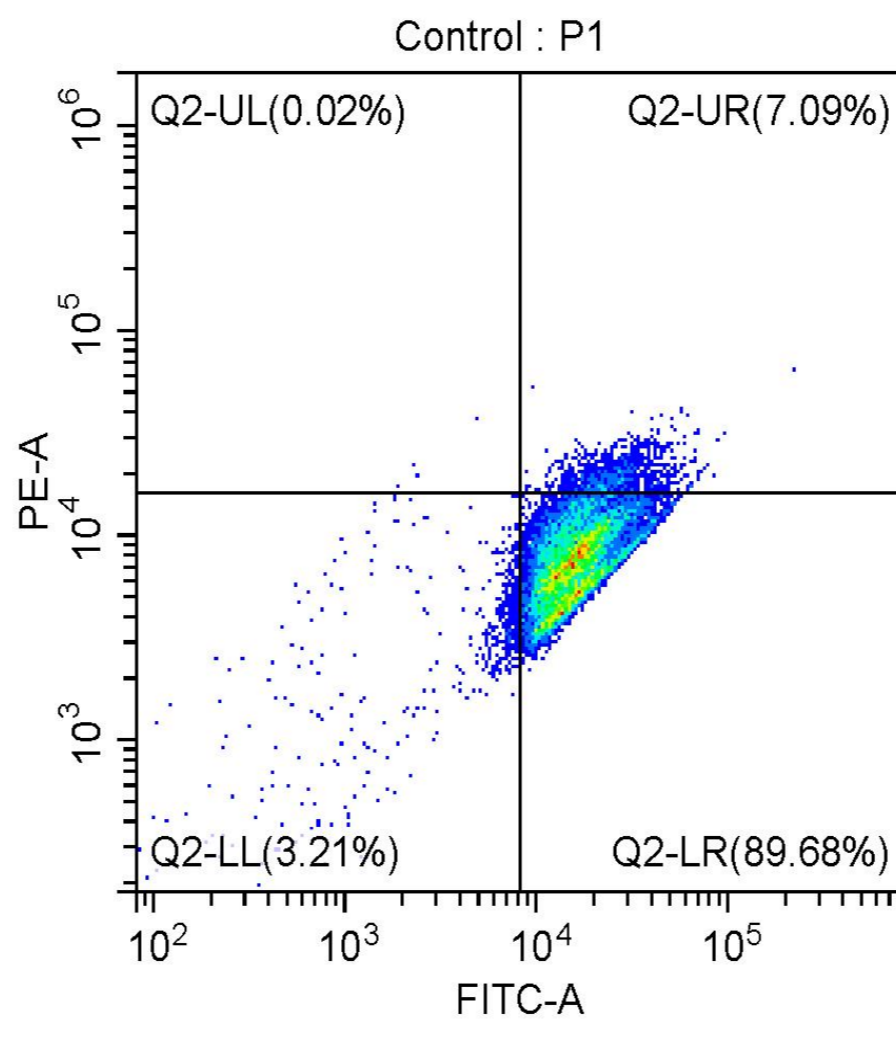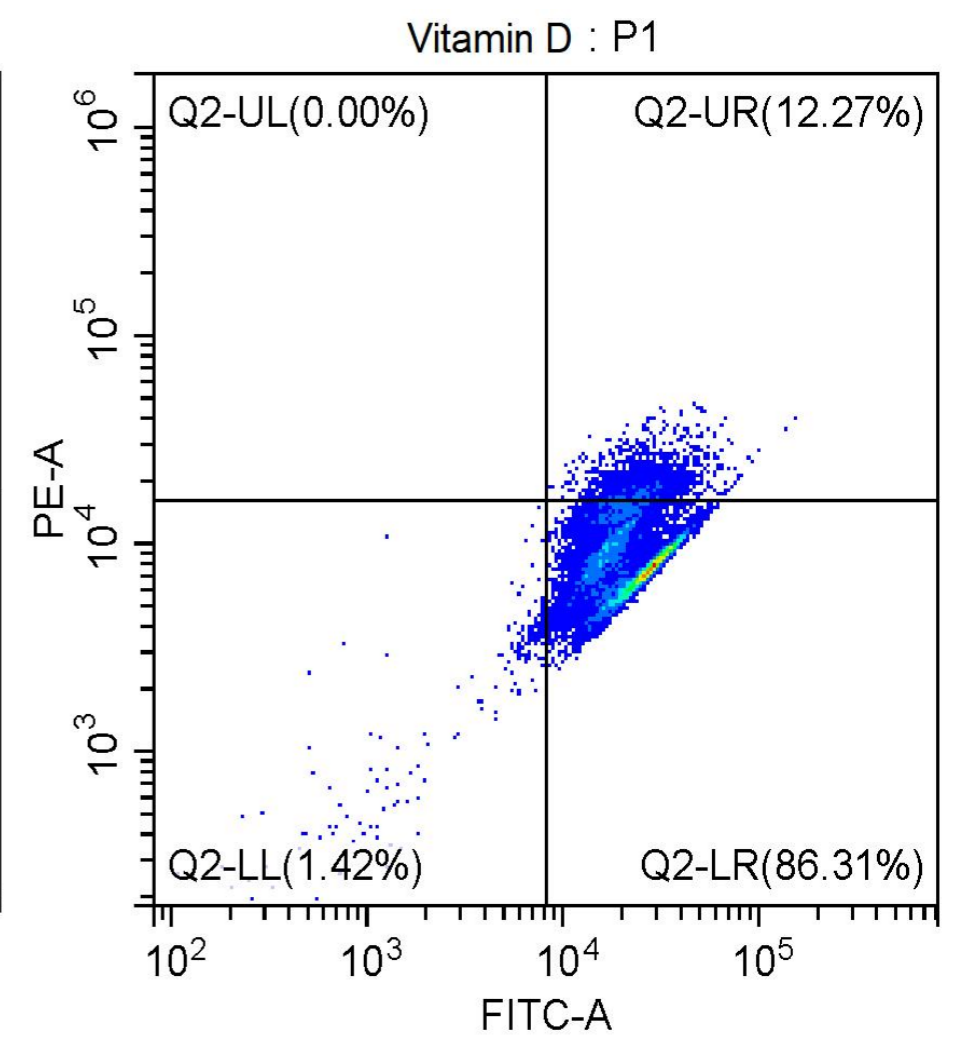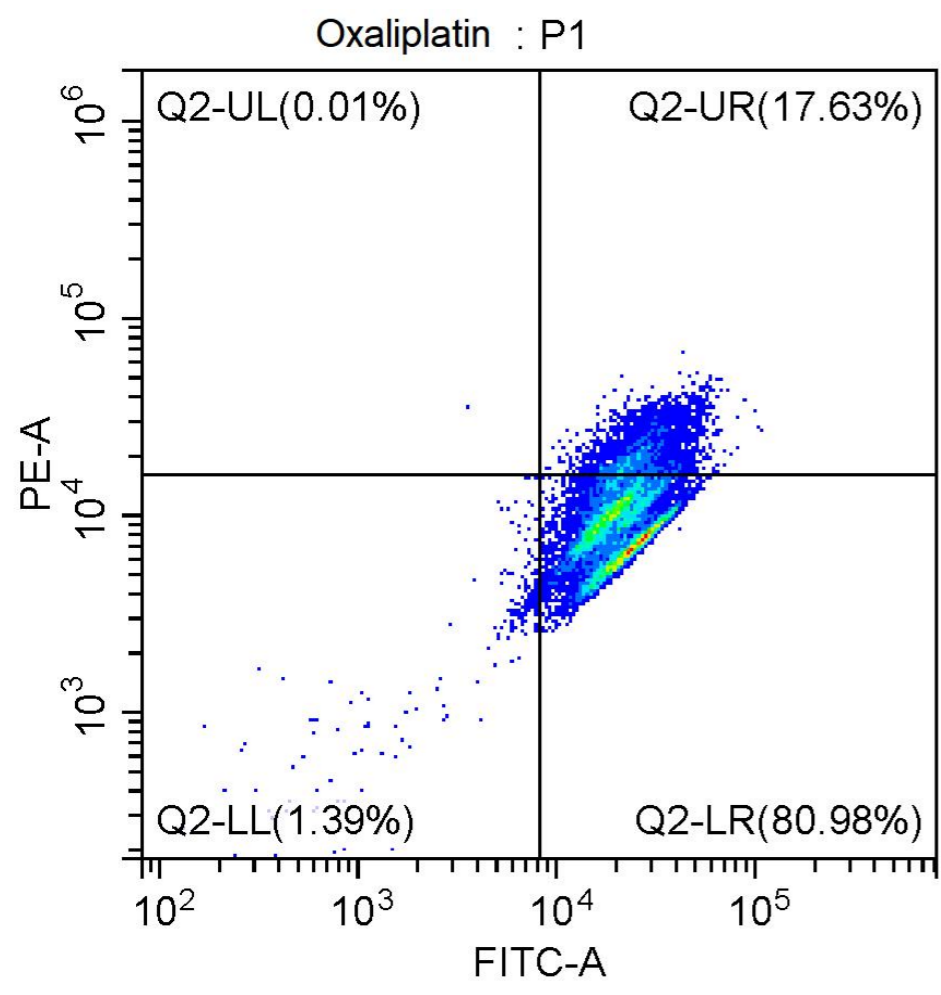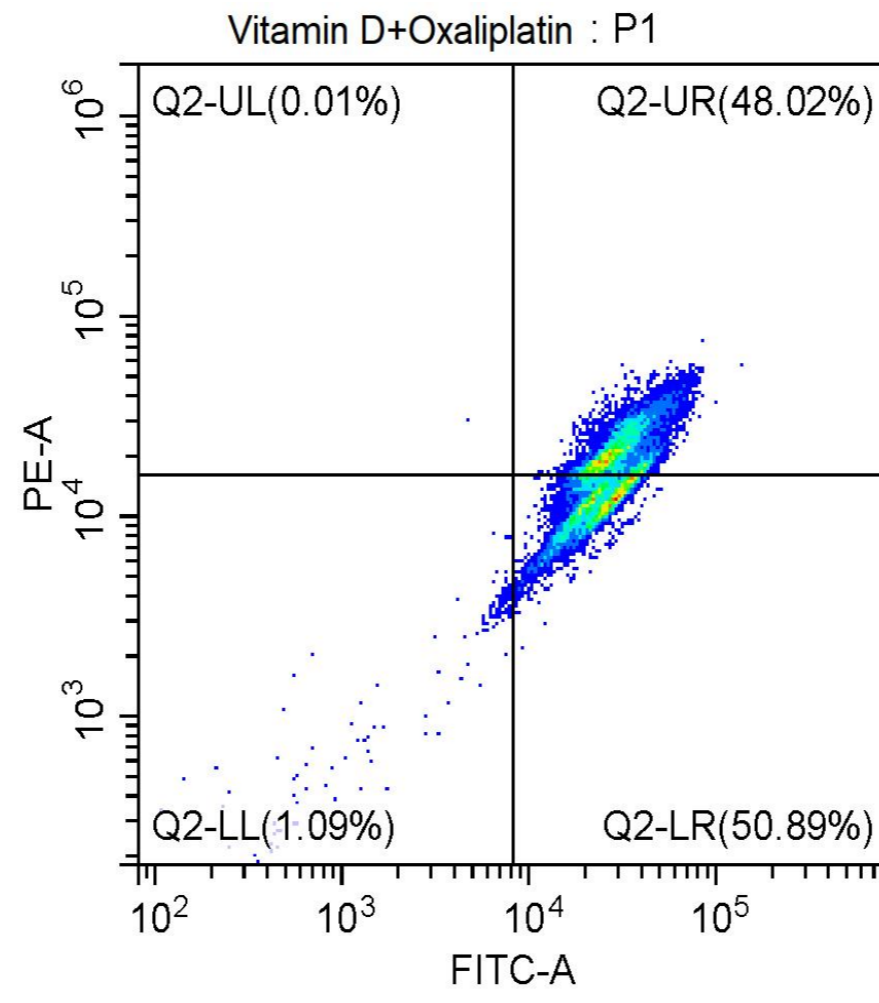

1 $\mu$ m
